# Supplementary material for: An immune-related lncRNA model for predicting prognosis, immune landscape and chemotherapeutic response in bladder cancer
Source: Sci Rep. 2022 Feb 25;12:3225. doi: 10.1038/s41598-022-07334-w (PMC8881497; doi:10.1038/s41598-022-07334-w)
Supplement: Supplementary file 5 — Supplementary Information 5. [file 41598_2022_7334_MOESM5_ESM.xlsx]

## Sheet: Sheet1
ID	Futime	Fustat	Age	Gender	Grade	Stage	T	M	N
TCGA-GU-AATP	1003	0	74	MALE	High Grade	Stage IV	T2	MX	N2
TCGA-CF-A1HR	389	0	62	MALE	High Grade	Stage III	T3	M0	N0
TCGA-GV-A3QK	832	0	56	FEMALE	High Grade	Stage IV	T4a	M0	N2
TCGA-XF-A9SJ	98	1	83	MALE	High Grade	Stage IV	T3b	MX	N2
TCGA-FD-A6TB	572	0	82	MALE	High Grade	Stage III	T3a	MX	N0
TCGA-FD-A5C0	407	0	61	MALE	High Grade	Stage IV	T3a	MX	N2
TCGA-XF-AAMX	206	1	87	FEMALE	High Grade	Stage III	T3b	MX	N0
TCGA-E7-A6ME	395	0	75	MALE	High Grade	Stage II	T2b	M0	NX
TCGA-FD-A3SS	391	1	66	MALE	High Grade	Stage IV	T4	MX	N3
TCGA-DK-A3WW	497	0	57	MALE	High Grade	Stage III	T3	M0	N0
TCGA-FD-A3SM	547	1	70	MALE	High Grade	Stage IV	T3a	M1	N2
TCGA-UY-A78K	536	1	60	MALE	High Grade	Stage IV	unknow	MX	N2
TCGA-XF-AAMQ	2177	0	59	FEMALE	High Grade	Stage II	T2a	MX	N0
TCGA-UY-A9PD	542	0	80	MALE	High Grade	Stage III	T3a	MX	N0
TCGA-MV-A51V	410	0	75	MALE	High Grade	Stage III	T3a	M0	N0
TCGA-GV-A6ZA	691	0	54	MALE	High Grade	Stage II	T2b	MX	N0
TCGA-R3-A69X	433	0	70	MALE	High Grade	Stage III	T3a	M0	N0
TCGA-FJ-A3Z7	945	0	76	MALE	High Grade	Stage IV	T4a	MX	N2
TCGA-E7-A7XN	428	0	66	MALE	High Grade	Stage III	T3	M0	N0
TCGA-UY-A9PB	899	0	49	MALE	High Grade	Stage III	T3a	MX	N0
TCGA-GU-AATO	324	1	75	MALE	High Grade	Stage IV	T4a	MX	N2
TCGA-ZF-A9R2	642	0	75	MALE	High Grade	Stage II	T2b	M0	N0
TCGA-DK-AA6U	578	0	64	MALE	unknow	Stage II	unknow	M0	N0
TCGA-KQ-A41O	1538	0	84	MALE	High Grade	Stage IV	T3	M0	N1
TCGA-ZF-A9R9	864	1	58	MALE	High Grade	Stage IV	T3b	MX	N2
TCGA-FD-A62S	368	0	60	FEMALE	High Grade	Stage III	T3b	MX	N0
TCGA-XF-AAN2	1869	1	73	MALE	High Grade	Stage II	T2b	MX	N0
TCGA-GV-A3JW	649	0	74	MALE	High Grade	Stage II	T2	MX	NX
TCGA-CF-A47X	384	0	60	MALE	Low Grade	Stage II	T2	M0	N0
TCGA-FD-A43Y	369	0	65	MALE	High Grade	Stage III	T4	MX	N0
TCGA-BT-A20V	154	1	59	FEMALE	High Grade	Stage IV	T4a	M0	N2
TCGA-DK-A2HX	55	0	80	FEMALE	High Grade	Stage IV	T3	M0	N2
TCGA-S5-A6DX	56	1	83	MALE	High Grade	Stage IV	T4a	MX	N2
TCGA-GC-A3YS	758	0	61	MALE	High Grade	Stage IV	T3a	MX	N1
TCGA-LT-A5Z6	474	0	56	MALE	High Grade	Stage II	unknow	MX	NX
TCGA-CU-A3KJ	562	0	75	MALE	High Grade	Stage III	T3b	M0	N0
TCGA-CU-A72E	413	1	76	MALE	High Grade	Stage IV	T3b	M0	N2
TCGA-FD-A5BY	251	0	63	FEMALE	High Grade	Stage III	T3a	MX	N0
TCGA-CF-A8HY	345	0	59	MALE	High Grade	Stage II	T2	M0	N0
TCGA-C4-A0F1	89	0	71	MALE	High Grade	Stage III	T3b	M0	N0
TCGA-BL-A0C8	876	0	73	MALE	High Grade	Stage I	T1	M0	NX
TCGA-SY-A9G0	378	0	82	MALE	High Grade	Stage IV	T4	M0	N1
TCGA-DK-A3IL	413	1	79	FEMALE	High Grade	Stage IV	T3	M0	N2
TCGA-FD-A3B6	209	0	75	MALE	High Grade	Stage II	T2b	MX	N0
TCGA-UY-A9PA	1072	0	48	MALE	High Grade	Stage III	T3a	MX	N0
TCGA-XF-A9SU	182	1	74	FEMALE	High Grade	Stage IV	T3b	MX	N1
TCGA-E7-A85H	394	0	64	MALE	High Grade	Stage III	T3	M0	N0
TCGA-E7-A677	443	0	81	MALE	Low Grade	Stage II	T2b	M0	N0
TCGA-XF-A9SK	486	1	65	MALE	High Grade	Stage IV	T3b	MX	N1
TCGA-CF-A47W	368	0	42	MALE	Low Grade	Stage II	T2	M0	N0
TCGA-CF-A47Y	373	0	55	MALE	Low Grade	Stage II	T2	M0	N0
TCGA-5N-A9KI	76	1	76	FEMALE	High Grade	Stage III	T4	MX	NX
TCGA-GV-A3JX	581	0	59	MALE	High Grade	Stage III	T3b	MX	N0
TCGA-ZF-A9RG	1786	0	70	FEMALE	High Grade	Stage III	T3b	MX	N0
TCGA-FD-A5BT	328	1	84	MALE	High Grade	Stage III	T3b	MX	N0
TCGA-CF-A9FM	398	0	50	MALE	High Grade	Stage I	T1	M0	N0
TCGA-H4-A2HQ	590	0	64	FEMALE	High Grade	Stage IV	unknow	M1	NX
TCGA-ZF-AA5N	168	1	62	FEMALE	High Grade	Stage IV	T2	M1	NX
TCGA-ZF-A9RC	2868	0	77	MALE	High Grade	Stage III	T3a	MX	N0
TCGA-BL-A3JM	205	1	62	MALE	High Grade	Stage III	T3	M0	N0
TCGA-FD-A5BR	656	0	57	MALE	High Grade	Stage II	T2b	MX	N0
TCGA-4Z-AA7R	522	1	73	MALE	High Grade	Stage IV	T4b	M0	N0
TCGA-YF-AA3M	415	0	57	MALE	High Grade	Stage II	T2a	MX	NX
TCGA-ZF-A9RE	106	1	78	FEMALE	High Grade	Stage II	unknow	MX	unknow
TCGA-DK-A3IQ	539	1	74	MALE	High Grade	Stage III	T3	M0	N0
TCGA-E7-A6MF	436	0	37	MALE	Low Grade	Stage II	T2a	M0	NX
TCGA-K4-A3WU	105	0	87	MALE	High Grade	Stage III	T4a	MX	N0
TCGA-4Z-AA7N	1367	1	65	MALE	High Grade	Stage III	T3a	M0	N0
TCGA-FD-A3SN	390	0	79	MALE	High Grade	Stage III	T3b	MX	N0
TCGA-DK-A1A5	65	1	79	MALE	High Grade	Stage II	T2b	M0	N0
TCGA-FD-A5BS	1261	0	68	MALE	High Grade	Stage III	T3b	MX	N0
TCGA-2F-A9KQ	2787	0	69	MALE	High Grade	Stage III	T3a	M0	N0
TCGA-E7-A3X6	407	0	70	MALE	Low Grade	Stage II	T2	M0	NX
TCGA-K4-A54R	842	0	59	MALE	High Grade	Stage II	T2b	MX	N0
TCGA-FD-A6TE	376	0	54	MALE	High Grade	Stage IV	T3a	MX	N2
TCGA-BT-A3PH	142	1	76	MALE	High Grade	Stage IV	T3b	MX	N2
TCGA-DK-AA6M	1582	0	64	FEMALE	High Grade	Stage II	T2	M0	N0
TCGA-GV-A3QF	617	1	79	MALE	High Grade	Stage IV	T3b	MX	N2
TCGA-DK-A6AV	1952	0	82	FEMALE	High Grade	Stage II	T2a	M0	N0
TCGA-ZF-AA4R	1036	1	67	MALE	High Grade	Stage IV	T3a	MX	N1
TCGA-DK-AA6T	572	0	63	MALE	High Grade	Stage II	unknow	M0	N0
TCGA-4Z-AA7M	405	0	65	MALE	High Grade	Stage III	T3a	M0	N0
TCGA-BT-A20Q	593	1	73	MALE	High Grade	Stage IV	T3b	M0	N2
TCGA-G2-A2EO	1072	0	69	MALE	High Grade	Stage III	T3a	M0	N0
TCGA-DK-A1AF	536	0	84	FEMALE	High Grade	Stage IV	T3	M0	N2
TCGA-E7-A6MD	129	0	66	MALE	High Grade	Stage IV	T4a	M0	N1
TCGA-FD-A5BX	173	1	82	MALE	High Grade	Stage IV	T3b	MX	N1
TCGA-ZF-A9R4	921	0	83	MALE	High Grade	Stage II	T2	M0	NX
TCGA-DK-A1A7	560	0	67	FEMALE	High Grade	Stage IV	T3	M0	N2
TCGA-XF-A9T2	575	1	54	MALE	High Grade	Stage III	T3b	MX	N0
TCGA-K4-A5RJ	53	0	75	MALE	High Grade	Stage II	T2b	MX	N0
TCGA-K4-A5RH	276	0	69	MALE	High Grade	Stage III	T3a	MX	N0
TCGA-4Z-AA7S	1064	1	66	MALE	High Grade	Stage III	T4a	M0	N0
TCGA-GU-A42P	332	1	72	MALE	High Grade	Stage IV	T3a	M0	N1
TCGA-BT-A20N	795	1	72	MALE	High Grade	Stage III	T3a	MX	N0
TCGA-G2-A3IB	220	1	66	MALE	High Grade	Stage II	unknow	MX	NX
TCGA-XF-AAMY	3011	0	78	MALE	High Grade	Stage III	T3b	MX	N0
TCGA-XF-A9T8	418	1	64	MALE	High Grade	Stage III	T3b	MX	N0
TCGA-FD-A3B4	477	0	55	FEMALE	High Grade	Stage III	T4a	MX	N0
TCGA-BT-A42C	873	0	64	MALE	High Grade	Stage II	unknow	M0	N0
TCGA-ZF-A9RF	1949	0	74	MALE	High Grade	Stage II	T1	M0	NX
TCGA-BL-A5ZZ	377	0	80	FEMALE	High Grade	Stage III	T4a	MX	N0
TCGA-4Z-AA7Y	1494	0	60	MALE	High Grade	Stage II	T2a	M0	N0
TCGA-GV-A3QI	322	0	47	MALE	High Grade	Stage III	T3b	MX	N0
TCGA-E5-A4U1	1181	0	72	MALE	High Grade	Stage II	T2b	M0	N0
TCGA-DK-AA74	1708	0	75	MALE	High Grade	Stage III	T3	M0	N0
TCGA-4Z-AA7W	840	0	55	MALE	High Grade	Stage II	T2a	M0	N0
TCGA-CU-A5W6	56	1	70	MALE	High Grade	Stage III	T4a	M0	N0
TCGA-FD-A5BU	476	0	76	FEMALE	High Grade	Stage II	T2b	MX	N0
TCGA-K4-AAQO	359	0	56	MALE	High Grade	Stage III	T3a	MX	N0
TCGA-4Z-AA89	1029	0	60	MALE	High Grade	Stage IV	T4b	M0	N0
TCGA-UY-A78M	690	1	81	FEMALE	High Grade	Stage IV	T2	MX	N2
TCGA-DK-A2I2	237	1	63	FEMALE	High Grade	Stage IV	T3	M0	N3
TCGA-XF-A9ST	128	1	68	MALE	High Grade	Stage III	T3b	MX	N0
TCGA-4Z-AA81	1270	1	80	MALE	High Grade	Stage II	T2b	M0	N0
TCGA-YC-A9TC	20	1	71	MALE	High Grade	Stage IV	unknow	M1	unknow
TCGA-KQ-A41N	1604	0	73	MALE	High Grade	Stage III	T3b	M0	N0
TCGA-E5-A2PC	1326	0	61	FEMALE	High Grade	Stage IV	T2b	MX	N1
TCGA-DK-A1A3	665	1	60	MALE	High Grade	Stage IV	T3	M0	N2
TCGA-XF-A8HG	467	1	69	MALE	High Grade	Stage III	T3b	MX	N0
TCGA-FD-A3SL	683	0	60	MALE	High Grade	Stage IV	T4a	M1	N2
TCGA-G2-A2EJ	931	0	56	FEMALE	High Grade	Stage II	unknow	M0	N0
TCGA-FD-A3SO	168	1	68	MALE	High Grade	Stage IV	T3a	MX	N1
TCGA-FD-A62P	191	1	76	MALE	High Grade	Stage II	T2b	MX	N0
TCGA-FD-A43X	110	0	84	MALE	High Grade	Stage II	T2a	MX	N0
TCGA-DK-A6B6	933	0	57	MALE	High Grade	Stage II	unknow	MX	NX
TCGA-ZF-A9R7	665	0	76	FEMALE	High Grade	Stage II	unknow	M0	NX
TCGA-XF-A8HI	544	1	57	FEMALE	High Grade	Stage IV	T2b	MX	N2
TCGA-BT-A20X	251	1	56	MALE	High Grade	Stage IV	T4a	M0	N2
TCGA-GV-A3QG		1	65	MALE	High Grade	Stage IV	T3a	MX	N3
TCGA-G2-A2ES	1004	1	85	MALE	High Grade	Stage II	T3b	M0	N0
TCGA-GC-A3BM	651	1	70	MALE	High Grade	Stage II	T2b	M0	N0
TCGA-DK-AA6W	415	1	78	MALE	High Grade	Stage II	T2	M0	N0
TCGA-E7-A5KE	17	0	78	FEMALE	High Grade	Stage II	T2a	M0	N0
TCGA-UY-A78L	1127	0	62	MALE	High Grade	Stage IV	unknow	MX	N1
TCGA-E7-A97P	437	1	73	MALE	High Grade	Stage II	T2	M0	NX
TCGA-XF-A9SH	1971	1	65	FEMALE	High Grade	Stage II	T2b	M0	N0
TCGA-FT-A61P	337	0	76	MALE	High Grade	Stage IV	T3b	MX	N2
TCGA-CU-A0YR	460	1	83	MALE	High Grade	Stage IV	T2	M0	N2
TCGA-DK-AA77	618	0	61	MALE	High Grade	Stage II	T2a	M0	N0
TCGA-CF-A9FH	-64	0	85	MALE	Low Grade	Stage II	T2	M0	N0
TCGA-E7-A5KF	20	0	67	MALE	Low Grade	Stage II	T2a	M0	N0
TCGA-DK-A2I6	2656	0	81	MALE	High Grade	Stage IV	T2b	M0	N1
TCGA-CF-A5UA	365	0	67	MALE	Low Grade	Stage II	T2	M0	N0
TCGA-DK-AA6X	467	0	63	MALE	High Grade	Stage II	unknow	M0	N0
TCGA-GU-A762	232	1	87	MALE	High Grade	Stage IV	T4a	MX	N2
TCGA-E7-A541	529	0	66	MALE	High Grade	Stage II	T2b	MX	N0
TCGA-BT-A2LB	492	1	73	FEMALE	High Grade	Stage III	T3a	M0	N0
TCGA-XF-A9T6	64	0	88	FEMALE	High Grade	Stage III	T3b	MX	N0
TCGA-DK-A3IV	294	1	60	MALE	High Grade	Stage II	unknow	M0	NX
TCGA-GD-A3OP	64	0	84	FEMALE	High Grade	Stage IV	T4a	MX	N2
TCGA-C4-A0F7	62	1	77	MALE	High Grade	Stage IV	T4b	M0	N2
TCGA-FD-A3B5	272	1	86	MALE	High Grade	Stage IV	T2b	MX	N1
TCGA-FD-A3SJ	739	1	59	MALE	High Grade	Stage IV	T2b	MX	N2
TCGA-FD-A3SQ	1423	1	62	MALE	High Grade	Stage IV	T3a	MX	N2
TCGA-FD-A43U	454	0	70	MALE	High Grade	Stage IV	T4a	MX	N2
TCGA-GV-A40E	261	1	75	MALE	High Grade	Stage II	unknow	MX	NX
TCGA-KQ-A41P	1094	0	76	MALE	High Grade	Stage IV	T3b	M1	N3
TCGA-XF-AAN1	941	1	75	FEMALE	High Grade	Stage III	T4a	M0	N0
TCGA-XF-A8HH	57	1	61	FEMALE	High Grade	Stage IV	T3b	M0	N2
TCGA-XF-A8HC	200	1	79	MALE	High Grade	Stage IV	T3a	MX	N2
TCGA-C4-A0EZ	273	1	69	FEMALE	High Grade	Stage IV	T3a	M1	N1
TCGA-ZF-AA56	259	1	79	FEMALE	High Grade	Stage III	T4a	MX	N0
TCGA-UY-A78N	2641	1	80	MALE	High Grade	Stage IV	T2	MX	N1
TCGA-PQ-A6FI	372	0	70	MALE	High Grade	Stage II	T2a	MX	N0
TCGA-CU-A0YN	393	1	60	MALE	High Grade	Stage III	T3a	M0	N0
TCGA-GD-A2C5	812	0	53	FEMALE	High Grade	Stage IV	T3a	MX	N2
TCGA-E5-A4TZ	467	1	64	MALE	High Grade	Stage IV	T4b	MX	N2
TCGA-XF-A8HF	2954	1	80	MALE	High Grade	Stage III	T3a	M0	N0
TCGA-GU-AATQ	213	1	68	MALE	High Grade	Stage III	T3b	MX	N0
TCGA-DK-A3WX	321	1	67	FEMALE	High Grade	Stage III	T3	M0	N0
TCGA-G2-AA3F	893	0	77	MALE	High Grade	Stage IV	T3	M0	N1
TCGA-XF-AAMR	2790	0	48	MALE	High Grade	Stage III	T3b	MX	N0
TCGA-BT-A3PJ	390	0	76	MALE	High Grade	Stage III	T3b	M0	N0
TCGA-XF-AAMH	344	1	80	MALE	High Grade	Stage IV	T3b	MX	N1
TCGA-XF-AAMT	90	1	75	FEMALE	High Grade	Stage IV	T3b	MX	N2
TCGA-CF-A47T	205	0	58	FEMALE	Low Grade	Stage II	T2	M0	N0
TCGA-XF-A9SP	454	1	59	MALE	High Grade	Stage III	T3b	MX	N0
TCGA-ZF-AA58	1649	0	61	FEMALE	High Grade	Stage IV	T3a	MX	N2
TCGA-CF-A7I0	368	0	54	MALE	Low Grade	Stage II	T2	M0	N0
TCGA-CF-A47V	379	0	52	MALE	High Grade	Stage II	T2	M0	N0
TCGA-XF-A9T0	799	0	68	MALE	High Grade	Stage III	T3b	MX	N0
TCGA-G2-A3VY	536	0	66	MALE	High Grade	Stage II	unknow	unknow	unknow
TCGA-BT-A20U	455	1	70	FEMALE	High Grade	Stage III	T3a	M0	N0
TCGA-XF-AAN5	2293	0	61	FEMALE	High Grade	Stage III	T3b	MX	N0
TCGA-E7-A4IJ	408	0	56	MALE	High Grade	Stage II	T2b	M0	NX
TCGA-ZF-AA4W	1830	0	56	MALE	High Grade	Stage III	T3b	MX	N0
TCGA-YC-A8S6	293	0	71	MALE	High Grade	Stage II	T2a	MX	N0
TCGA-FD-A6TA	1912	0	58	MALE	High Grade	Stage IV	T3b	MX	N2
TCGA-UY-A8OD	3432	0	68	FEMALE	High Grade	Stage II	T2b	MX	N0
TCGA-GC-A3RC	484	0	59	MALE	High Grade	Stage II	T2b	M0	N0
TCGA-4Z-AA83	1943	0	52	MALE	High Grade	Stage II	T2a	M0	N0
TCGA-4Z-AA7Q	510	1	79	MALE	High Grade	Stage III	T3a	M0	NX
TCGA-BT-A2LA	522	0	54	MALE	High Grade	Stage III	T3a	M0	N0
TCGA-GV-A3QH	258	1	67	MALE	High Grade	Stage II	unknow	MX	NX
TCGA-DK-AA6S	5050	0	60	MALE	High Grade	Stage III	T3b	M0	N0
TCGA-SY-A9G5	960	0	66	MALE	High Grade	Stage III	T4a	M0	N0
TCGA-FD-A43S	455	0	71	FEMALE	High Grade	Stage III	T3b	MX	N0
TCGA-BT-A2LD	623	1	78	FEMALE	High Grade	Stage IV	T3a	M0	N1
TCGA-GD-A3OS	638	0	54	FEMALE	High Grade	Stage II	unknow	MX	NX
TCGA-DK-AA71	415	0	71	MALE	High Grade	Stage II	T2b	M0	N0
TCGA-XF-AAMF	329	1	68	MALE	High Grade	Stage IV	T4	MX	N2
TCGA-LC-A66R	466	0	78	MALE	High Grade	Stage IV	T4a	MX	N2
TCGA-2F-A9KR	3148	0	59	FEMALE	High Grade	Stage III	T3a	M0	N0
TCGA-CF-A27C	425	0	52	MALE	High Grade	Stage III	T3	M0	N0
TCGA-FD-A3SP	401	0	60	MALE	High Grade	Stage III	T3b	MX	N0
TCGA-FD-A3SR	602	1	68	MALE	High Grade	Stage IV	T4a	MX	N2
TCGA-DK-AA6Q	413	1	61	FEMALE	High Grade	Stage IV	T3	M0	N1
TCGA-BL-A13I	223	1	57	FEMALE	High Grade	Stage III	T3	M0	N0
TCGA-BT-A42E	738	0	74	MALE	High Grade	Stage III	T3a	M0	N0
TCGA-E7-A519	508	0	72	MALE	High Grade	Stage II	T2b	M0	NX
TCGA-4Z-AA7O	399	0	64	MALE	High Grade	Stage II	T2a	M0	N0
TCGA-XF-AAN7	565	1	60	MALE	High Grade	Stage IV	T3a	MX	N1
TCGA-4Z-AA87	1454	0	72	MALE	High Grade	Stage III	T4a	M0	N0
TCGA-DK-A1A6	2020	0	53	MALE	High Grade	Stage IV	T2a	M0	N1
TCGA-XF-A9SW	362	1	85	MALE	High Grade	Stage IV	T3b	MX	N2
TCGA-FD-A6TI	294	1	73	MALE	High Grade	Stage IV	T4b	MX	N1
TCGA-GC-A6I1	0	0	90	FEMALE	High Grade	Stage II	T2b	MX	N0
TCGA-DK-A1AA	578	0	57	MALE	High Grade	Stage III	T3	M0	N0
TCGA-BT-A20P	544	1	81	FEMALE	High Grade	Stage III	T3a	M0	N0
TCGA-XF-AAML	232	1	75	MALE	High Grade	Stage II	T2b	MX	N0
TCGA-G2-AA3D	1960	0	60	MALE	High Grade	Stage IV	T3	M0	N2
TCGA-K4-A3WV	646	0	77	FEMALE	High Grade	Stage II	T2b	MX	N0
TCGA-4Z-AA84	460	0	61	MALE	High Grade	Stage IV	T3a	M1	N2
TCGA-ZF-A9R3	949	1	53	FEMALE	High Grade	Stage II	T2	M0	NX
TCGA-DK-A1AB	508	1	74	FEMALE	High Grade	Stage IV	T4a	M0	N2
TCGA-XF-A8HB	1370	0	50	FEMALE	High Grade	Stage II	T2b	MX	N0
TCGA-K4-A4AC	278	1	83	MALE	High Grade	Stage II	T2b	MX	N0
TCGA-DK-A3IS	1529	0	68	MALE	High Grade	Stage II	T2a	M0	N0
TCGA-CF-A5U8	399	0	59	MALE	Low Grade	Stage II	T2	M0	N0
TCGA-UY-A9PF	117	0	77	MALE	High Grade	Stage IV	T3a	MX	N2
TCGA-BT-A3PK	303	1	80	MALE	High Grade	Stage II	T2b	MX	N0
TCGA-KQ-A41R	1350	0	80	FEMALE	High Grade	Stage II	T2	MX	N0
TCGA-XF-A9SG	1479	0	81	MALE	High Grade	Stage II	T2a	MX	N0
TCGA-FD-A43N	699	0	76	MALE	High Grade	Stage III	T3a	MX	N0
TCGA-GV-A40G	428	0	77	MALE	High Grade	Stage II	T2a	MX	N0
TCGA-ZF-A9RM	1455	0	70	MALE	High Grade	Stage II	T0	MX	N0
TCGA-BT-A42F	864	0	64	MALE	High Grade	Stage IV	T4a	MX	N1
TCGA-4Z-AA86	311	1	66	MALE	High Grade	Stage IV	T3a	M0	N1
TCGA-ZF-A9R0	680	1	82	MALE	High Grade	Stage III	T3b	M0	NX
TCGA-C4-A0F6	700	0	82	FEMALE	High Grade	Stage III	T3b	M0	N0
TCGA-XF-A9SX	719	1	63	FEMALE	High Grade	Stage IV	T3b	MX	N2
TCGA-XF-AAMW	253	1	79	FEMALE	High Grade	Stage IV	T2b	unknow	N0
TCGA-GU-A764	610	0	66	MALE	High Grade	Stage II	T2b	MX	N0
TCGA-DK-AA6R	5041	0	68	MALE	High Grade	Stage IV	T4	M0	N1
TCGA-CF-A47S	333	0	41	MALE	Low Grade	Stage II	T2	M0	N0
TCGA-4Z-AA80	19	1	73	MALE	High Grade	Stage II	T2a	M0	N0
TCGA-ZF-AA5H	897	0	60	FEMALE	High Grade	Stage IV	T3b	M0	N2
TCGA-GU-A766	480	0	62	MALE	High Grade	Stage II	T2a	MX	N0
TCGA-XF-A9T5	2027	0	78	FEMALE	High Grade	Stage IV	T3a	MX	N1
TCGA-DK-A1AE	491	0	84	MALE	High Grade	Stage III	T3	M0	N0
TCGA-ZF-A9RD	408	1	75	FEMALE	High Grade	Stage IV	T3a	MX	N2
TCGA-ZF-AA52	1077	1	70	MALE	High Grade	Stage III	T3a	MX	NX
TCGA-HQ-A5NE	370	1	57	MALE	High Grade	Stage III	T3	M0	N0
TCGA-CF-A9FF	361	0	52	MALE	High Grade	Stage II	T2	M0	N0
TCGA-UY-A78P	2380	0	78	FEMALE	High Grade	Stage II	T2	MX	N0
TCGA-DK-A6B2	477	0	70	MALE	High Grade	Stage IV	T3	M0	N1
TCGA-G2-AA3B	2008	0	75	FEMALE	High Grade	Stage II	T2	M0	N0
TCGA-XF-A9T4	495	1	48	MALE	High Grade	Stage IV	T2b	MX	N1
TCGA-BT-A20W	254	1	71	MALE	High Grade	Stage II	T2b	M0	N0
TCGA-G2-A2EC	696	1	58	FEMALE	High Grade	Stage II	unknow	M0	N0
TCGA-GU-A763	824	0	72	MALE	High Grade	Stage III	T4	M0	N0
TCGA-DK-A1AC	3981	0	72	MALE	High Grade	Stage III	T3b	M0	N0
TCGA-CF-A3MG	369	0	48	MALE	Low Grade	Stage II	T2	M0	N0
TCGA-ZF-A9RL	2703	0	61	MALE	High Grade	Stage II	unknow	MX	unknow
TCGA-BT-A42B	534	1	59	MALE	High Grade	Stage IV	T3a	MX	N1
TCGA-G2-A2EL	819	1	77	MALE	High Grade	Stage II	unknow	M0	N0
TCGA-FJ-A871	272	1	49	MALE	High Grade	Stage III	T3b	MX	NX
TCGA-XF-AAMG	3364	0	49	MALE	High Grade	Stage III	T4a	MX	N0
TCGA-GC-A3I6	630	1	45	MALE	High Grade	Stage III	T3a	M0	N0
TCGA-DK-A2I4	3835	0	79	MALE	High Grade	Stage III	T3b	M0	N0
TCGA-UY-A8OC	0	1	90	MALE	High Grade	Stage IV	T4	MX	N1
TCGA-BT-A20O	370	1	75	MALE	High Grade	Stage III	T3a	MX	N0
TCGA-DK-A6AW	1264	0	70	MALE	High Grade	Stage II	T2a	M0	N0
TCGA-BT-A20R	154	1	79	FEMALE	High Grade	Stage IV	T3b	M0	N1
TCGA-BT-A0S7	200	1	75	MALE	High Grade	Stage III	T4a	MX	N0
TCGA-CF-A3MI	370	0	62	MALE	Low Grade	Stage II	T2	M0	N0
TCGA-FJ-A3ZE	324	1	65	MALE	High Grade	Stage IV	unknow	M1	N3
TCGA-GD-A6C6	67	0	64	MALE	High Grade	Stage III	T3a	MX	N0
TCGA-FD-A6TG	93	1	73	MALE	High Grade	Stage IV	T3a	MX	N2
TCGA-DK-A3IM	238	0	76	MALE	High Grade	Stage III	T3	M0	N0
TCGA-KQ-A41S	35	0	87	FEMALE	High Grade	Stage III	T4a	MX	NX
TCGA-XF-AAN4	823	1	77	FEMALE	High Grade	Stage III	T3b	MX	N0
TCGA-ZF-AA53	1761	0	60	MALE	High Grade	Stage II	T2	M0	NX
TCGA-GU-A767	144	1	81	MALE	High Grade	Stage IV	T3b	MX	N2
TCGA-E7-A7DU	28	0	73	MALE	Low Grade	Stage III	T3	M0	N0
TCGA-ZF-AA51	1714	0	69	FEMALE	High Grade	Stage II	T2	M0	NX
TCGA-FD-A6TF	69	1	80	FEMALE	High Grade	Stage IV	T3b	M1	N2
TCGA-FD-A43P	454	0	74	MALE	High Grade	Stage II	T2a	MX	N0
TCGA-GC-A3WC	540	0	80	FEMALE	High Grade	Stage III	T3	MX	N0
TCGA-FD-A3NA	1338	0	60	MALE	High Grade	Stage II	T2b	MX	N0
TCGA-DK-A6B1	2049	0	67	MALE	High Grade	Stage II	T2a	M0	N0
TCGA-ZF-A9RN	615	1	67	FEMALE	High Grade	Stage III	T3b	M0	NX
TCGA-ZF-AA4T	599	1	65	MALE	High Grade	Stage IV	T4	MX	N2
TCGA-DK-AA76	366	0	64	FEMALE	High Grade	Stage II	unknow	M0	N0
TCGA-GC-A4ZW	15	0	71	MALE	High Grade	Stage III	T3a	M0	N0
TCGA-ZF-A9R5	1090	0	59	MALE	High Grade	Stage III	T3	M0	N0
TCGA-GU-A42R	344	0	68	MALE	High Grade	Stage IV	T4a	MX	N2
TCGA-BL-A13J	81	1	65	MALE	High Grade	Stage IV	T4	M0	N2
TCGA-DK-AA6L	1163	1	48	MALE	High Grade	Stage IV	T3	MX	N1
TCGA-DK-A1AD	3420	0	69	MALE	High Grade	Stage IV	T3b	M0	N2
TCGA-4Z-AA82	1556	1	59	MALE	High Grade	Stage IV	T2a	M0	N1
TCGA-G2-A3IE	612	1	51	MALE	High Grade	Stage II	unknow	MX	NX
TCGA-DK-AA6P	457	0	72	FEMALE	High Grade	Stage II	unknow	M0	N0
TCGA-G2-A2EF	1884	0	50	MALE	High Grade	Stage II	unknow	M0	N0
TCGA-XF-A8HE	3817	0	47	MALE	High Grade	Stage III	T3b	MX	N0
TCGA-XF-A9SL	2020	1	69	MALE	High Grade	Stage IV	T3a	MX	N2
TCGA-XF-A9SZ	859	1	79	MALE	High Grade	Stage IV	T3b	MX	N2
TCGA-YF-AA3L	364	0	47	FEMALE	High Grade	Stage II	T2b	MX	N0
TCGA-S5-AA26	503	0	46	MALE	High Grade	Stage III	T3a	MX	N0
TCGA-C4-A0F0	59	0	60	MALE	High Grade	Stage II	T2b	M0	N0
TCGA-DK-A3IT	459	0	62	MALE	High Grade	Stage III	T3	M0	N0
TCGA-ZF-AA54	590	1	71	MALE	High Grade	Stage III	T3	MX	NX
TCGA-E7-A97Q	246	1	60	FEMALE	High Grade	Stage IV	T4a	MX	N3
TCGA-HQ-A5ND	274	1	78	MALE	High Grade	Stage IV	T3b	M0	N1
TCGA-CF-A9FL	565	1	85	MALE	High Grade	Stage III	T3b	M0	N0
TCGA-G2-AA3C	211	1	66	MALE	High Grade	Stage IV	T3b	M0	N1
TCGA-FD-A6TC	187	0	79	FEMALE	High Grade	Stage III	T4a	MX	N0
TCGA-FD-A6TK	330	0	60	MALE	High Grade	Stage III	T3a	MX	N0
TCGA-XF-A8HD	2964	0	77	MALE	High Grade	Stage III	T3a	MX	N0
TCGA-DK-A3X2	547	1	85	MALE	High Grade	Stage IV	T3	M0	N2
TCGA-GC-A6I3	0	0	90	FEMALE	High Grade	Stage IV	T3a	MX	N1
TCGA-FD-A3N5	363	0	69	MALE	High Grade	Stage II	T2b	MX	N0
TCGA-XF-A9SI	2423	0	73	FEMALE	High Grade	Stage II	T2b	MX	N0
TCGA-FT-A3EE	99	1	80	FEMALE	High Grade	Stage III	T4a	MX	N0
TCGA-CU-A3YL	496	0	67	MALE	High Grade	Stage III	T4a	M0	N0
TCGA-UY-A8OB	2109	0	63	MALE	High Grade	Stage IV	T3a	MX	N1
TCGA-5N-A9KM	530	1	73	FEMALE	High Grade	Stage III	T4a	MX	N0
TCGA-2F-A9KT	2352	0	83	MALE	High Grade	Stage II	T2b	M0	N0
TCGA-FD-A5BV	163	1	47	FEMALE	High Grade	Stage III	T3b	MX	N0
TCGA-GC-A3RB	582	0	54	MALE	High Grade	Stage III	T3b	M0	N0
TCGA-DK-A2I1	546	0	73	FEMALE	High Grade	Stage II	T2b	M0	N0
TCGA-FD-A3B7	122	1	66	MALE	High Grade	Stage III	T3a	MX	N0
TCGA-FD-A62N	82	0	69	MALE	High Grade	Stage III	T3b	MX	N0
TCGA-E7-A3Y1	163	0	57	MALE	Low Grade	Stage II	unknow	M0	N0
TCGA-DK-A3X1	1460	0	78	FEMALE	High Grade	Stage III	T3	M0	N0
TCGA-KQ-A41Q	361	0	89	MALE	High Grade	Stage III	T3b	MX	N0
TCGA-E7-A4XJ	68	1	66	MALE	High Grade	Stage II	T2	M0	N0
TCGA-K4-A83P	495	0	77	MALE	unknow	Stage IV	T4a	MX	N1
TCGA-K4-A5RI	356	1	67	FEMALE	High Grade	Stage III	T3a	MX	N0
TCGA-DK-A1AG	475	0	65	MALE	High Grade	Stage III	T3	M0	N0
TCGA-ZF-AA4X	2044	0	56	MALE	High Grade	Stage II	T2	M0	NX
TCGA-2F-A9KO	678	0	63	MALE	High Grade	Stage IV	T3	M0	N1
TCGA-GU-A42Q	344	1	67	MALE	High Grade	Stage III	T3b	M0	N0
TCGA-YC-A89H	573	0	78	FEMALE	High Grade	Stage II	unknow	MX	unknow
TCGA-K4-A3WS	761	0	66	MALE	High Grade	Stage III	T3a	MX	N0
TCGA-GC-A3OO	481	0	79	MALE	High Grade	Stage II	T2b	M0	N0
TCGA-XF-A9SY	640	0	60	FEMALE	High Grade	Stage IV	T3b	MX	N2
TCGA-CF-A3MF	383	0	34	MALE	Low Grade	Stage III	T3	M0	N0
TCGA-FD-A6TH	131	1	63	MALE	High Grade	Stage IV	T3	MX	N2
TCGA-DK-A6B0	2330	0	61	MALE	High Grade	Stage II	T2b	M0	N0
TCGA-LT-A8JT	641	0	69	FEMALE	High Grade	Stage II	T2a	M0	N0
TCGA-XF-AAN8	118	1	74	FEMALE	High Grade	Stage III	T3b	MX	N0
TCGA-XF-A9T3	68	0	69	FEMALE	High Grade	Stage IV	T3b	MX	N2
TCGA-DK-A3IU	609	0	58	MALE	High Grade	Stage II	T2b	M0	N0
TCGA-ZF-AA4V	1806	0	66	MALE	High Grade	Stage III	T3b	M0	N0
TCGA-XF-AAMZ	1348	1	81	FEMALE	High Grade	Stage IV	T3a	MX	N2
TCGA-E7-A8O8	13	0	59	MALE	High Grade	Stage II	T2	M0	N0
TCGA-FD-A62O	216	1	74	MALE	High Grade	Stage IV	T3a	MX	N2
TCGA-XF-A9SV	388	1	82	MALE	High Grade	Stage IV	T4a	M1	N2
TCGA-ZF-AA5P	372	0	65	MALE	High Grade	Stage IV	T2b	M0	N2
TCGA-PQ-A6FN	507	0	78	FEMALE	High Grade	Stage III	T3a	MX	N0
TCGA-E7-A7PW	416	0	63	MALE	High Grade	Stage III	T3a	M0	NX
TCGA-E7-A678	425	0	55	MALE	Low Grade	Stage III	T3	M0	N0
TCGA-2F-A9KW	254	1	67	FEMALE	High Grade	Stage III	T3b	MX	N0
TCGA-UY-A78O	2312	0	75	FEMALE	High Grade	Stage II	T2	MX	N0
TCGA-DK-A3IN	250	1	72	MALE	High Grade	Stage III	T4a	M0	N0
TCGA-FD-A5C1	1603	0	61	FEMALE	High Grade	Stage III	T3b	MX	N0
TCGA-XF-AAN0	1718	1	68	MALE	High Grade	Stage IV	T4a	M0	N2
TCGA-CF-A8HX	345	0	55	FEMALE	High Grade	Stage II	T2	M0	N0
TCGA-GD-A3OQ	95	0	48	MALE	High Grade	Stage IV	T4a	MX	N1
TCGA-FJ-A3Z9	385	1	72	MALE	High Grade	unknow	TX	M0	N0
TCGA-GC-A3RD	428	0	83	FEMALE	High Grade	Stage III	T3a	M0	N0
TCGA-ZF-AA4U	262	1	70	MALE	High Grade	Stage III	T4a	MX	NX
TCGA-FJ-A3ZF	524	0	73	MALE	High Grade	Stage III	unknow	M0	N0
TCGA-E7-A7DV	37	0	44	MALE	High Grade	Stage IV	T4	MX	N3
TCGA-XF-AAME	2828	1	64	FEMALE	High Grade	Stage II	T2b	MX	N0
TCGA-CU-A0YO	149	1	84	MALE	High Grade	Stage IV	T3a	MX	N2
TCGA-G2-A2EK	485	0	57	MALE	High Grade	Stage II	unknow	M0	N0
TCGA-DK-A3IK	67	0	87	MALE	High Grade	Stage IV	T3	M0	N2
TCGA-UY-A9PH	1561	0	73	MALE	High Grade	Stage II	T2b	MX	N0
TCGA-E7-A8O7	466	0	52	MALE	Low Grade	Stage II	T2	M0	N0
TCGA-CF-A3MH	398	0	75	MALE	Low Grade	Stage II	T2	M0	N0
TCGA-FD-A5BZ	835	1	77	FEMALE	High Grade	Stage IV	T3a	MX	N1
TCGA-FD-A3B3	392	0	74	FEMALE	High Grade	Stage III	T3	MX	N0
TCGA-GV-A3JZ	603	0	55	MALE	High Grade	Stage IV	T4a	MX	N3
TCGA-HQ-A2OE	1174	0	69	MALE	unknow	unknow	T2a	MX	N2
TCGA-BT-A0YX	400	1	70	FEMALE	High Grade	Stage III	T3b	M0	N0
TCGA-XF-AAMJ	1670	1	70	MALE	High Grade	Stage III	T3b	M0	N0
TCGA-CU-A3QU	158	0	58	MALE	High Grade	Stage IV	T2b	M0	N1
TCGA-XF-A9SM	1048	0	76	MALE	High Grade	Stage III	T3b	MX	N0
TCGA-K4-A6FZ	55	0	75	FEMALE	High Grade	Stage III	T3a	MX	N0
TCGA-BT-A20T	453	1	63	MALE	High Grade	Stage IV	T3b	M0	N1
TCGA-ZF-A9R1	773	0	81	MALE	High Grade	Stage IV	T3b	M0	N1
TCGA-DK-A3WY	4283	0	67	FEMALE	High Grade	Stage III	T3	M0	N0
TCGA-2F-A9KP	364	1	66	MALE	High Grade	Stage IV	T3a	MX	N2
TCGA-K4-A6MB	469	0	64	MALE	High Grade	Stage IV	T3b	MX	N1
TCGA-DK-A6B5	1249	0	45	MALE	High Grade	Stage IV	T4a	M0	N2
TCGA-XF-AAN3	2625	0	76	MALE	High Grade	Stage IV	T3b	MX	N2
TCGA-FD-A3B8	378	0	56	MALE	High Grade	Stage II	T2b	MX	N0
TCGA-BT-A20J	579	1	75	MALE	High Grade	Stage II	T2b	MX	N0
TCGA-FD-A6TD	386	1	77	MALE	High Grade	Stage III	T3a	MX	N0
TCGA-H4-A2HO	46	0	53	MALE	High Grade	Stage III	T4a	MX	N0
TCGA-GV-A3JV	434	1	66	MALE	High Grade	Stage IV	T3b	MX	N1
TCGA-UY-A9PE	189	0	86	MALE	High Grade	Stage IV	T2b	MX	N2
TCGA-FD-A3N6	483	0	43	FEMALE	High Grade	Stage II	T2b	MX	N0
TCGA-GD-A76B	224	0	86	FEMALE	High Grade	Stage II	T2b	MX	N0
TCGA-DK-AA75	340	1	82	MALE	High Grade	Stage III	T3	M0	N0
